# Multidrug treatment with nelfinavir and cepharanthine against COVID-19

Hirofumi Ohashi<sup>1,2,†</sup>, Koichi Watashi<sup>1,2,3,4,†\*</sup>, Wakana Saso<sup>1,5,6,†</sup>, Kaho Shionoya<sup>1,2</sup>, Shoya Iwanami<sup>7</sup>, Takatsugu Hirokawa<sup>8,9,10</sup>, Tsuyoshi Shirai<sup>11</sup>, Shigehiko Kanaya<sup>12</sup>, Yusuke Ito<sup>7</sup>, Kwang Su Kim<sup>7</sup>, Kazane Nishioka<sup>1,2</sup>, Shuji Ando<sup>13</sup>, Keisuke Ejima<sup>14</sup>, Yoshiki Koizumi<sup>15</sup>, Tomohiro Tanaka<sup>16</sup>, Shin Aoki<sup>16,17</sup>, Kouji Kuramochi<sup>2</sup>, Tadaki Suzuki<sup>18</sup>, Katsumi Maenaka<sup>19</sup>, Tetsuro Matano<sup>5,6</sup>, Masamichi Muramatsu<sup>1</sup>, Masayuki Saijo<sup>13</sup>, Kazuyuki Aihara<sup>20</sup>, Shingo Iwami<sup>4,7,21,22,23</sup>, Makoto Takeda<sup>24</sup>, Jane A. McKeating<sup>25</sup>, Takaji Wakita<sup>1</sup>

<sup>1</sup>Department of Virology II, National Institute of Infectious Diseases, Tokyo 162-8640, Japan,

<sup>2</sup>Department of Applied Biological Science, Tokyo University of Science, Noda 278-8510, Japan,

<sup>3</sup>Institute for Frontier Life and Medical Sciences, Kyoto University, Kyoto 606-8507, Japan,

<sup>4</sup>MIRAI, JST, Saitama 332-0012, Japan,

<sup>5</sup>The Institute of Medical Science, The University of Tokyo, Tokyo 108-8639, Japan,

<sup>6</sup>AIDS Research Center, National Institute of Infectious Diseases, Tokyo 162-8640, Japan,

<sup>7</sup>Department of Biology, Faculty of Sciences, Kyushu University, Fukuoka 812-8581, Japan,

<sup>8</sup>Cellular and Molecular Biotechnology Research Institute, National Institute of Advanced Industrial Science and Technology, Tokyo 135-0064, Japan,

<sup>9</sup>Division of Biomedical Science, Faculty of Medicine, University of Tsukuba, Tsukuba 305-8575, Japan,

<sup>10</sup>Transborder Medical Research Center, University of Tsukuba, Tsukuba 305-8575, Japan,

<sup>11</sup>Faculty of Bioscience, Nagahama Institute of Bio-Science and Technology, Nagahama 526-0829, Japan,

<sup>12</sup>Graduate School of Science and Technology, Nara Institute of Science and Technology, Ikoma 630-0192, Japan,

<sup>13</sup>Department of Virology I, National Institute of Infectious Diseases, Tokyo 162-8640, Japan,

<sup>14</sup>Department of Epidemiology and Biostatistics, Indiana University School of Public Health-Bloomington, IN 47405, USA,

<sup>15</sup>National Center for Global Health and Medicine, Tokyo 162-8655, Japan,

<sup>16</sup>Faculty of Pharmaceutical Sciences, Tokyo University of Science, Noda 278-8510, Japan,

<sup>17</sup>Research Institute for Science and Technology, Tokyo University of Science, Noda 278-8510, Japan,

<sup>18</sup>Department of Pathology, National Institute of Infectious Diseases, Tokyo 162-8640, Japan,

<sup>19</sup>Faculty of Pharmaceutical Sciences, Hokkaido University, Sapporo 060-0812, Japan,

<sup>20</sup>International Research Center for Neurointelligence, The University of Tokyo Institutes for Advanced Study, The University of Tokyo, Tokyo 113-8654, Japan,

<sup>21</sup>Institute for the Advanced Study of Human Biology (ASHBi), Kyoto University, Kyoto 606-8501, Japan,

<sup>22</sup>NEXT-Ganken Program, Japanese Foundation for Cancer Research (JFCR), Tokyo 135-8550, Japan,

<sup>23</sup>Science Groove Inc., Fukuoka 810-0041, Japan,

<sup>24</sup>Department of Virology III, National Institute of Infectious Diseases, Tokyo 208-0011, Japan,

<sup>25</sup>Nuffield Department of Medicine, University of Oxford, Oxford OX3 7FZ, UK.

## \*Correspondence:

E-mail: [kwatashi@nih.go.jp](mailto:kwatashi@nih.go.jp) (Koichi Watashi)

<sup>†</sup>These authors contributed equally to this work

45 **Summary**

46 Antiviral treatments targeting the emerging coronavirus disease 2019 (COVID-19) are urgently required.  
47 We screened a panel of already-approved drugs in a cell culture model of severe acute respiratory  
48 syndrome coronavirus 2 (SARS-CoV-2) and identified two new antiviral agents: the HIV protease inhibitor  
49 Nelfinavir and the anti-inflammatory drug Cepharranthine. *In silico* modeling shows Nelfinavir binds the  
50 SARS-CoV-2 main protease consistent with its inhibition of viral replication, whilst Cepharranthine inhibits  
51 viral attachment and entry into cells. Consistent with their different modes of action, *in vitro* assays  
52 highlight a synergistic effect of this combined treatment to limit SARS-CoV-2 proliferation. Mathematical  
53 modeling *in vitro* antiviral activity coupled with the known pharmacokinetics for these drugs predicts that  
54 Nelfinavir will facilitate viral clearance. Combining Nelfinavir/Cepharranthine enhanced their predicted  
55 efficacy to control viral proliferation, to ameliorate both the progression of disease and risk of transmission.  
56 In summary, this study identifies a new multidrug combination treatment for COVID-19.

57

58

## 59 **Introduction**

60 The novel coronavirus infectious disease 2019 (COVID-19), caused by the severe acute respiratory  
61 syndrome coronavirus 2 (SARS-CoV-2), is a global public health problem that is impacting social and  
62 economic damage worldwide (Huang et al., 2020; Zhou et al., 2020; Zhu et al., 2020). As of April 12,  
63 2020, 1,696,588 confirmed cases with 105,952 deaths were reported across 213  
64 countries/areas/territories (WHO). COVID-19 was characterized as a pandemic by the World Health  
65 Organization (WHO), however, there is no approved treatment. Several drugs have been evaluated in  
66 COVID-19 patients in clinical trials: including Lopinavir (LPV) and Ritonavir, Chloroquine (CLQ),  
67 Favipiravir (FPV), and Interferon, all repurposed FDA-approved drugs, together with Remdesivir (RDV),  
68 an antiviral agent that awaits clinical approval (Cao et al., 2020; Dong et al., 2020; Touret and de  
69 Lamballerie, 2020). The clinical efficacies of these drugs are expected shortly, however, additional  
70 treatment options are urgently needed.

71 In this study, we screened a panel of FDA/EMA/PMDA-approved drugs in a SARS-CoV-2 infection cell  
72 culture assay and identified two, Nelfinavir (NFV) and Cepharranthine (CEP), that show more potent  
73 antiviral activity in this *in vitro* screen compared to drugs currently being trialed. Our screen shows that  
74 both NFV and CEP inhibit SARS-CoV-2 at concentrations that can be achieved in the clinic and their  
75 different modes of action provide an exciting opportunity for combined multidrug treatment against  
76 COVID-19.

77

78

## 79 **Results**

### 80 **Anti-SARS-CoV-2 activity of Nelfinavir and Cepharranthine.**

81 We established a cell-based drug screening system to identify compounds that protect cells from  
82 SARS-CoV-2-induced cytopathology (Fig. 1A): VeroE6/TMPRSS2 cells were treated with compounds for  
83 1 h during inoculation with a clinical isolate of SARS-CoV-2 (Matsuyama et al., 2020) at a multiplicity of  
84 infection (MOI) of 0.01. Unbound virus was removed by washing and the cells treated with compounds  
85 for 48 h to assess cell viability (Fig. 1A) (Methods). SARS-CoV-2 replication in VeroE6/TMPRSS2  
86 induced a cytopathic effect and to validate our assay we show that two compounds, LPV and CLQ, that  
87 were reported to inhibit SARS-CoV-2 infection (Wang, M. et al., 2020), reduced virus-induced  
88 cytopathicity (Fig. 1B, compare b and c, d).

89 After screening 306 FDA/EMA/PMDA-approved drugs, we identified compounds that protected cell  
90 viability by 20-fold compared with a DMSO solvent control (Methods) (Supplementary Table S1). Among  
91 these, we selected to study NFV and CEP as candidates showing the greatest anti-cytopathic activity  
92 (Fig. 1B, f and g). NFV targets human immunodeficiency virus (HIV) protease and CEP is a Stephania-  
93 derived alkaloid extract having anti-inflammatory and anti-oxidative activities (Bailly, 2019; Kao et al.,  
94 2015; Markowitz et al., 1998). To confirm and extend these observations we assessed SARS-CoV-2  
95 encoded N protein expression 24 h post-inoculation by immunofluorescence (Fig. 1C, red) and

96 immunoblotting (Fig. 1D). Both NFV and CEP significantly reduced N protein expression, confirming  
97 these compounds inhibit SARS-CoV-2 proliferation. To quantify their anti-SARS-CoV-2 activity, we  
98 treated cells with a range of drug concentrations and measured secreted viral RNA 24 h post-infection.  
99 NFV and CEP, together with CLQ and LPV, significantly reduced viral RNA levels in a dose-dependent  
100 manner to 0.001 ~ 0.01% of the untreated control infections (Fig. 1E). FPV showed negligible antiviral  
101 activity against SARS-CoV-2, consistent with previous reports (Choy et al., 2020; Wang, M. et al., 2020).  
102 In parallel we assessed cell viability and noted cell death at high drug concentrations up to 64  $\mu$ M (Fig.  
103 1F). The concentration of drugs required to inhibit 50% (IC<sub>50</sub>) or 90% (IC<sub>90</sub>) of virus replication along  
104 with their 50% cytotoxicity (CC<sub>50</sub>) are listed in Fig. 1E and F. These experiments highlight a > 70-fold  
105 window (CC<sub>50</sub>/IC<sub>50</sub>) where NFV and CEP can inhibit SARS-CoV-2 proliferation with minimal toxicity.

106 We previously reported a method to quantify instantaneous inhibitory potential (IIP) (Koizumi et al.,  
107 2017) and imply that NFV and CEP will have higher antiviral potentials than LPV and CLQ, respectively  
108 (Supplementary Note, Supplementary Table S2).

109

#### 110 **Modes of action of Nelfinavir and Cepharranthine.**

111 To define how these compounds impact on the viral replicative life cycle, we performed a time of  
112 addition assay (Fig. 2A). We measured the antiviral activity of drugs added at different times: (a) present  
113 during the 1 h virus inoculation step and maintained throughout the 24 h infection period (**whole life**  
114 **cycle**); (b) present during the 1 h virus inoculation step and for an additional 2 h and then removed  
115 (**entry**); or (c) added after the inoculation step and present for the remaining 22 h of infection (**post-entry**).  
116 CLQ, a known modulator of intracellular pH that non-specifically inhibits virus entry (Akpovwa, 2016), was  
117 recently reported to inhibit SARS-CoV-2 (Liu, J. et al., 2020; Wang, M. et al., 2020) and we confirmed its  
118 activity in the early stages of infection (Fig. 2B, lane 8). RDV was previously reported to inhibit the  
119 process for intracellular viral replication (Wang, M. et al., 2020) and we confirmed this mode of action  
120 showing a reduction in viral RNA levels with a negligible effect on virus entry (Fig. 2B, lane 5).

121 This assay identified NFV as a replication inhibitor whilst CEP targeted the virus entry phase (Fig. 2B,  
122 lanes 10-15). These data are consistent with reports that LPV and NFV inhibited the replication of other  
123 coronaviruses, SARS-CoV (Liu et al., 2005; Wu et al., 2004; Yamamoto et al., 2004), and that CEP  
124 reduced the entry of human coronavirus OC43 (Kim et al., 2019).

125 Since NFV binds the HIV-1 protease we used an *in silico* docking simulation to assess its potential  
126 interaction with the SARS-CoV-2 encoded main protease (Fig. 2C). NFV was ranked in the top 1.5% of  
127 compounds following an *in silico* screen of the SARS-CoV-2 encoded main protease (see Methods) (Fig.  
128 2C, cyan stick: NFV, green: main protease). Our docking model predicts that NFV interacts with the  
129 SARS-CoV-2 protease active site pocket and would block the recruitment of substrates.

130 To investigate whether CEP inhibits SARS-CoV-2 particle attachment or internalization into cells, we  
131 established an assay to measure viral attachment to cells by pre-chilling to inhibit particle endocytosis.  
132 Cell-bound virus particles are measured by qPCR of viral RNA. Viruses frequently exploit cellular

133 heparan sulfate proteoglycans to initiate low affinity attachment and heparin shows broad-spectrum  
134 inhibition of virus-cell attachment (De Clercq, 1998; Lang et al., 2011). Unsurprisingly, heparin blocked  
135 SARS-CoV-2 particle attachment to VeroE6/TMPRSS2 cells (Fig. 2D). We demonstrate that CEP  
136 significantly inhibited SARS-CoV-2 attachment to cells, whereas CLQ that targets intracellular trafficking  
137 pathways (Liu, J. et al., 2020) had no effect (Fig. 2D). *In silico* docking simulation confirms that CEP  
138 molecule (a major component of the pharmaceutical preparation of CEP) can bind to SARS-CoV-2 Spike  
139 protein and interfere with the Spike engagement to its receptor, angiotensin-converting enzyme 2 (ACE2)  
140 (Lan et al., 2020; Walls et al., 2020; Wang, Q. et al., 2020) (Fig. 2E, green stick: CEP molecule, orange:  
141 Spike, semi-transparent cyan: ACE2). These data highlight a new role for CEP to inhibit SARS-CoV-2  
142 particle attachment to cells.

143

#### 144 **Nelfinavir and Cepharranthine show synergistic antiviral activity.**

145 NFV showed a modest increase in antiviral activity ( $IC_{90}$  of 1.18  $\mu$ M) compared to LPV ( $IC_{90}$  of 3.61  
146  $\mu$ M), similarly CEP ( $IC_{90}$  of 0.91  $\mu$ M) showed greater antiviral activity than CLQ ( $IC_{90}$  of 3.97  $\mu$ M).  
147 Importantly, both NFV and CEP show anti-SARS-CoV-2 activity within the concentration ranges achieved  
148 in patients, where the  $C_{max}$  of both drugs are 6.9 and 2.3  $\mu$ M (by administration of 500 mg NFV orally and  
149 of 100 mg CEP by intravenous injection) respectively (Markowitz et al., 1998; Yasuda et al., 1989).  
150 Since NFV and CEP have different mode of actions, we examined their potential for synergistic effects.  
151 Antiviral activity and cell viability were determined by qPCR enumeration of viral RNA and MTT activity,  
152 respectively, following treatment with each compound alone or in combination (Fig. 3). For these  
153 experiments, we infected cells with lower amounts of SARS-CoV-2 (MOI=0.001) than used in our earlier  
154 drug screen. Single treatment with NFV or CEP reduced viral RNA in a dose-dependent manner and  
155 co-treatment further reduced viral RNA levels (Fig. 3A): e.g. NFV (2.24  $\mu$ M) or CEP (3.20  $\mu$ M) alone  
156 reduced viral RNA to 5.8% and 6.3% of untreated control, respectively, however, their combination  
157 reduced viral RNA level to 0.068%. Higher doses of the NFV/CEP combined treatment (4  $\mu$ M each)  
158 reduced the viral RNA to undetectable levels. We compared the observed experimental antiviral activity  
159 (Fig. 3A, Supplementary Fig. S1A) with theoretical predictions calculated using a classical Bliss  
160 independence method that assumes the drugs act independently (Supplementary Note, Supplementary  
161 Fig. S1B) (Greco et al., 1995; Koizumi and Iwami, 2014). The difference between the observed values  
162 and theoretical predictions suggest that NFV and CEP exhibit a synergistic activity over a broad range of  
163 concentrations (Fig. 3C red: synergistic effect).

164

#### 165 **Modeling the impact of Nelfinavir and Cepharranthine on SARS-CoV-2 dynamics.**

166 Combining the published clinical pharmacokinetics information for these drugs with our observed  
167 dose-dependent antiviral activities, we can predict the time-dependent antiviral activity (Fig. 4A: left, NFV  
168 oral; center, CEP intravenous drip; right: CEP oral) and the resultant viral load dynamics after drug  
169 administration (Fig. 4B, Supplementary Note, Supplementary Fig. S2). From such viral dynamics shown  
170 in Fig. 4B, we calculated the cumulative viral RNA burden (i.e., area under the curve of viral load) (Fig.  
171 4C, upper) and the time period to reduce the viral load to undetectable levels (Fig. 4C, lower). Our

172 modeling analysis predict that NFV would reduce the cumulative viral load by 91.4% (Fig. 4C, upper, red)  
173 and would require 11.9 days to eliminate virus (Fig. 4B, upper left, red), 3.98 days shorter than non-  
174 treatment condition (Fig. 4C, lower, red). In contrast, treatment with CEP alone showed a limited effect  
175 on the viral load [Fig. 4B, upper right or lower left, green], most likely reflecting the low concentration of  
176 the drug when administered orally or by intravenous drip (see Discussion). However, co-administering  
177 NFV (oral) and CEP (intravenous drip) resulted in a more rapid decline in viral RNA, with undetectable  
178 levels 5.5 days earlier than non-treatment and 1.5 days earlier than NFV alone (Fig. 4C). Another  
179 advantage of combination treatment is discussed in Discussion. In summary, NFV is likely to show  
180 antiviral activity at clinically achievable drug concentration and combination treatment with CEP will  
181 facilitate virus elimination.

182

183

## 184 **Discussion**

185 Screening a panel of approved drugs identified two agents, NFV and CEP, with potent antiviral activity  
186 against SARS-CoV-2. NFV inhibits SARS-CoV-2 replication and our modeling data suggests this is  
187 mediated via a direct interaction with the viral encoded main protease (Fig. 2B and C). A recent study  
188 reported that CEP exhibited anti-SARS-CoV-2 activity (Fan et al., 2020), these authors speculated that  
189 CEP targeted both the entry and viral replication phase. However, our time of addition experiments  
190 suggest that CEP predominantly inhibits viral entry (Fig. 2B, lane 14). Furthermore, virus-cell  
191 attachment assays and docking simulations confirm that CEP inhibits virus attachment to target cells (Fig.  
192 2D and E). There is a significant global effort to generate a COVID-19 vaccine that will target the SARS-  
193 CoV-2 encoded Spike glycoprotein (Thanh Le et al., 2020) that is required for particle engagement of the  
194 receptor ACE2 for infecting cells. We predict that CEP may work synergistically with vaccine induced  
195 anti-S antibody responses and such experiments are worthy of future investigation. Further mechanistic  
196 studies will be required to confirm the proposed mechanisms of action of these compounds. However,  
197 our observation that NFV and CEP target different steps in the viral life cycle support the development of  
198 multidrug combination therapies for treating COVID-19.

199 Our mathematical modeling studies assess how anti-SARS-CoV-2 drug candidates can suppress virus  
200 proliferation and facilitate virus elimination (Fig. 4). At clinical doses NFV can maintain strong antiviral  
201 effect over time and thus can reduce SARS-CoV-2 RNA burden that results in shortening the time required  
202 to eliminate infection. In contrast, CEP monotherapy is predicted to have a modest antiviral effect  
203 because of a low concentration *in vivo* when administered by oral or intravenous drip. However, higher  
204 doses of CEP, based on its relatively safe toxicity profile (Rogosnitzky and Danks, 2011), may increase  
205 drug efficacy in a clinical setting. It is noteworthy that combining CEP with NFV further reduced the  
206 cumulative viral load and facilitated virus elimination. As the cumulative viral load in patients is likely to  
207 be closely related with the progression of disease and the risk for new transmission (Liu, Y. et al., 2020),  
208 such multidrug treatment will be of benefit to improve clinical outcome and to control epidemic. In  
209 addition to potentiating antiviral effects, multidrug treatment can limit the emergence of viral drug-



210 resistance which is frequently reported for RNA viruses such as coronavirus.

211 One limitation of our modeling of drug efficacy is the use of *in vitro* data derived cell culture infection  
212 systems without confirmation using *in vivo* infection models. Recently, a SARS-CoV-2 infection system  
213 was reported using ferrets, but as yet there is no evidence on the usefulness of this model for evaluating  
214 anti-SARS-CoV-2 drugs (Kim et al., 2020). Given the urgency of the problem, this lack of *in vivo* testing  
215 should not prevent the assessment of new antiviral agents. Our screening of approved drugs has  
216 identified NFV and CEP as potential anti-SARS-CoV-2 agents. As both NFV and CEP show superior  
217 antiviral activities compared to many current drug candidates, these agents offer a promising new  
218 multidrug treatment to combat COVID-19.

219

220

## 221 **Acknowledgments**

222 We thank Drs. Shuetsu Fukushi and Souichi Yamada at Department of Virology I, National Institute of  
223 Infectious Diseases for technical assistance. NFV, LPV, and FPV were kindly provided by Japan  
224 Tobacco, Abbvie, and Fujifilm Toyama Chemical. Pharmaceutical preparation of CEP was kindly  
225 provided by Medisa Shinyaku Inc, a subsidiary of Sawai Pharmaceutical. This work was supported by  
226 The Agency for Medical Research and Development (AMED) emerging/re-emerging infectious diseases  
227 project (JP19fk0108111, JP19fk0108110, JP20fk0108104); the AMED Basis for Supporting Innovative  
228 Drug Discovery and Life Science Research (BINDS, JP19am0101114, JP19am0101069,  
229 JP19am0101111) program; The Japan Society for the Promotion of Science KAKENHI (JP17H04085,  
230 JP20H03499, JP15H05707, 19H04839); The JST MIRAI program; and Wellcome Trust funded  
231 Investigator award (200838/Z/16/Z).

232

233

## 234 **Author Contributions**

235 Conceptualization, K.W.; Investigation, H.O., K.W., W.S., K.S., S.Iwanami, T.H., T.S., S.K., Y.I., K.S.K.,  
236 K.N., S.Iwami; Methodology and Resources, S.Ando., T.S., K.M., M.S., M.T., T.W.; Analysis, All the  
237 authors; Writing and editing, K.W., T.H., K.A., S.Iwami, J.A.M; Funding Acquisition, K.W., M.T.;  
238 Supervision, K.W.

239

240

## 241 **Competing Interests**

242 No interests

243

244

245 **References**

- 246 Akpowwa, H. (2016). Chloroquine could be used for the treatment of filoviral infections and other viral  
247 infections that emerge or emerged from viruses requiring an acidic pH for infectivity. *Cell Biochem Funct.*  
248 34(4), 191-196. Published online 2016/03/24 DOI: 10.1002/cbf.3182.
- 249 Bailly, C. (2019). Cepharanthine: An update of its mode of action, pharmacological properties and medical  
250 applications. *Phytomedicine.* 62, 152956. Published online 2019/05/28 DOI:  
251 10.1016/j.phymed.2019.152956.
- 252 Cao, B., Wang, Y., Wen, D., Liu, W., Wang, J., Fan, G., Ruan, L., Song, B., Cai, Y., Wei, M., et al. (2020).  
253 A Trial of Lopinavir-Ritonavir in Adults Hospitalized with Severe Covid-19. *N Engl J Med.* Published online  
254 2020/03/19 DOI: 10.1056/NEJMoa2001282.
- 255 Choy, K.T., Yin-Lam Wong, A., Kaewpreedee, P., Sia, S.F., Chen, D., Yan Hui, K.P., Wing Chu, D.K., Wai  
256 Chan, M.C., Pak-Hang Cheung, P., Huang, X., et al. (2020). Remdesivir, lopinavir, emetine, and  
257 homoharringtonine inhibit SARS-CoV-2 replication in vitro. *Antiviral Res.* 104786. Published online  
258 2020/04/07 DOI: 10.1016/j.antiviral.2020.104786.
- 259 De Clercq, E. (1998). Virus Attachment. *Pharmacochemistry Library.* 29, 91-104.
- 260 Dong, L., Hu, S., and Gao, J. (2020). Discovering drugs to treat coronavirus disease 2019 (COVID-19).  
261 *Drug Discov Ther.* 14(1), 58-60. Published online 2020/03/10 DOI: 10.5582/ddt.2020.01012.
- 262 Fan, H.H., Wang, L.Q., Liu, W.L., An, X.P., Liu, Z.D., He, X.Q., Song, L.H., and Tong, Y.G. (2020).  
263 Repurposing of clinically approved drugs for treatment of coronavirus disease 2019 in a 2019-novel  
264 coronavirus (2019-nCoV) related coronavirus model. *Chin Med J (Engl).* Published online 2020/03/10  
265 DOI: 10.1097/CM9.0000000000000797.
- 266 Greco, W.R., Bravo, G., and Parsons, J.C. (1995). The search for synergy: a critical review from a  
267 response surface perspective. *Pharmacol Rev.* 47(2), 331-385. Published online 1995/06/01.
- 268 Huang, C., Wang, Y., Li, X., Ren, L., Zhao, J., Hu, Y., Zhang, L., Fan, G., Xu, J., Gu, X., et al. (2020).  
269 Clinical features of patients infected with 2019 novel coronavirus in Wuhan, China. *Lancet.* 395(10223),  
270 497-506. Published online 2020/01/28 DOI: 10.1016/S0140-6736(20)30183-5.
- 271 Kao, M.C., Yang, C.H., Sheu, J.R., and Huang, C.J. (2015). Cepharanthine mitigates pro-inflammatory  
272 cytokine response in lung injury induced by hemorrhagic shock/resuscitation in rats. *Cytokine.* 76(2), 442-  
273 448. Published online 2015/09/17 DOI: 10.1016/j.cyto.2015.09.008.
- 274 Kim, D.E., Min, J.S., Jang, M.S., Lee, J.Y., Shin, Y.S., Song, J.H., Kim, H.R., Kim, S., Jin, Y.H., and Kwon,  
275 S. (2019). Natural Bis-Benzylisoquinoline Alkaloids-Tetrandrine, Fangchinoline, and Cepharanthine,  
276 Inhibit Human Coronavirus OC43 Infection of MRC-5 Human Lung Cells. *Biomolecules.* 9(11). Published  
277 online 2019/11/07 DOI: 10.3390/biom9110696.
- 278 Kim, Y.I., Kim, S.G., Kim, S.M., Kim, E.H., Park, S.J., Yu, K.M., Chang, J.H., Kim, E.J., Lee, S., Casel,  
279 M.A.B., et al. (2020). Infection and Rapid Transmission of SARS-CoV-2 in Ferrets. *Cell Host Microbe.*  
280 Published online 2020/04/08 DOI: 10.1016/j.chom.2020.03.023.
- 281 Koizumi, Y., and Iwami, S. (2014). Mathematical modeling of multi-drugs therapy: a challenge for  
282 determining the optimal combinations of antiviral drugs. *Theor Biol Med Model.* 11, 41. Published online



- 283 2014/09/26 DOI: 10.1186/1742-4682-11-41.
- 284 Koizumi, Y., Ohashi, H., Nakajima, S., Tanaka, Y., Wakita, T., Perelson, A.S., Iwami, S., and Watashi, K.  
285 (2017). Quantifying antiviral activity optimizes drug combinations against hepatitis C virus infection. *Proc*  
286 *Natl Acad Sci U S A.* 114(8), 1922-1927. Published online 2017/02/09 DOI: 10.1073/pnas.1610197114.
- 287 Lan, J., Ge, J., Yu, J., Shan, S., Zhou, H., Fan, S., Zhang, Q., Shi, X., Wang, Q., Zhang, L., et al. (2020).  
288 Structure of the SARS-CoV-2 spike receptor-binding domain bound to the ACE2 receptor. *Nature.*  
289 Published online 2020/04/01 DOI: 10.1038/s41586-020-2180-5.
- 290 Lang, J., Yang, N., Deng, J., Liu, K., Yang, P., Zhang, G., and Jiang, C. (2011). Inhibition of SARS  
291 pseudovirus cell entry by lactoferrin binding to heparan sulfate proteoglycans. *PLoS One.* 6(8), e23710.  
292 Published online 2011/09/03 DOI: 10.1371/journal.pone.0023710.
- 293 Liu, J., Cao, R., Xu, M., Wang, X., Zhang, H., Hu, H., Li, Y., Hu, Z., Zhong, W., and Wang, M. (2020).  
294 Hydroxychloroquine, a less toxic derivative of chloroquine, is effective in inhibiting SARS-CoV-2 infection  
295 in vitro. *Cell Discov.* 6, 16. Published online 2020/03/21 DOI: 10.1038/s41421-020-0156-0.
- 296 Liu, Y., Yan, L.M., Wan, L., Xiang, T.X., Le, A., Liu, J.M., Peiris, M., Poon, L.L.M., and Zhang, W. (2020).  
297 Viral dynamics in mild and severe cases of COVID-19. *Lancet Infect Dis.* Published online 2020/03/23  
298 DOI: 10.1016/S1473-3099(20)30232-2.
- 299 Liu, Y.C., Huang, V., Chao, T.C., Hsiao, C.D., Lin, A., Chang, M.F., and Chow, L.P. (2005). Screening of  
300 drugs by FRET analysis identifies inhibitors of SARS-CoV 3CL protease. *Biochem Biophys Res Commun.*  
301 333(1), 194-199. Published online 2005/06/14 DOI: 10.1016/j.bbrc.2005.05.095.
- 302 Markowitz, M., Conant, M., Hurley, A., Schluger, R., Duran, M., Peterkin, J., Chapman, S., Patick, A.,  
303 Hendricks, A., Yuen, G.J., et al. (1998). A preliminary evaluation of nelfinavir mesylate, an inhibitor of  
304 human immunodeficiency virus (HIV)-1 protease, to treat HIV infection. *J Infect Dis.* 177(6), 1533-1540.  
305 Published online 1998/06/02 DOI: 10.1086/515312.
- 306 Matsuyama, S., Nao, N., Shirato, K., Kawase, M., Saito, S., Takayama, I., Nagata, N., Sekizuka, T., Katoh,  
307 H., Kato, F., et al. (2020). Enhanced isolation of SARS-CoV-2 by TMPRSS2-expressing cells. *Proc Natl*  
308 *Acad Sci U S A.* 117(13), 7001-7003. Published online 2020/03/14 DOI: 10.1073/pnas.2002589117.
- 309 Rogosnitzky, M., and Danks, R. (2011). Therapeutic potential of the biscochlorine alkaloid, cepharanthine,  
310 for a range of clinical conditions. *Pharmacol Rep.* 63(2), 337-347. Published online 2011/05/24 DOI:  
311 10.1016/s1734-1140(11)70500-x.
- 312 Thanh Le, T., Andreadakis, Z., Kumar, A., Gomez Roman, R., Tollefsen, S., Saville, M., and Mayhew, S.  
313 (2020). The COVID-19 vaccine development landscape. *Nat Rev Drug Discov.* Published online  
314 2020/04/11 DOI: 10.1038/d41573-020-00073-5.
- 315 Touret, F., and de Lamballerie, X. (2020). Of chloroquine and COVID-19. *Antiviral Res.* 177, 104762.  
316 Published online 2020/03/10 DOI: 10.1016/j.antiviral.2020.104762.
- 317 Walls, A.C., Park, Y.J., Tortorici, M.A., Wall, A., McGuire, A.T., and Velesler, D. (2020). Structure, Function,  
318 and Antigenicity of the SARS-CoV-2 Spike Glycoprotein. *Cell.* Published online 2020/03/11 DOI:  
319 10.1016/j.cell.2020.02.058.
- 320 Wang, M., Cao, R., Zhang, L., Yang, X., Liu, J., Xu, M., Shi, Z., Hu, Z., Zhong, W., and Xiao, G. (2020).  
321 Remdesivir and chloroquine effectively inhibit the recently emerged novel coronavirus (2019-nCoV) in

322 vitro. Cell Res. 30(3), 269-271. Published online 2020/02/06 DOI: 10.1038/s41422-020-0282-0.  
323 Wang, Q., Zhang, Y., Wu, L., Niu, S., Song, C., Zhang, Z., Lu, G., Qiao, C., Hu, Y., Yuen, K.Y., et al.  
324 (2020). Structural and Functional Basis of SARS-CoV-2 Entry by Using Human ACE2. Cell. Published  
325 online 2020/04/11 DOI: 10.1016/j.cell.2020.03.045.  
326 WHO Coronavirus disease (COVID-19) Pandemic. [https://www.who.int/emergencies/diseases/novel-](https://www.who.int/emergencies/diseases/novel-coronavirus-2019)  
327 [coronavirus-2019](https://www.who.int/emergencies/diseases/novel-coronavirus-2019).  
328 Wu, C.Y., Jan, J.T., Ma, S.H., Kuo, C.J., Juan, H.F., Cheng, Y.S., Hsu, H.H., Huang, H.C., Wu, D., Brik,  
329 A., et al. (2004). Small molecules targeting severe acute respiratory syndrome human coronavirus. Proc  
330 Natl Acad Sci U S A. 101(27), 10012-10017. Published online 2004/07/01 DOI:  
331 10.1073/pnas.0403596101.  
332 Yamamoto, N., Yang, R., Yoshinaka, Y., Amari, S., Nakano, T., Cinatl, J., Rabenau, H., Doerr, H.W.,  
333 Hunsmann, G., Otaka, A., et al. (2004). HIV protease inhibitor nelfinavir inhibits replication of SARS-  
334 associated coronavirus. Biochem Biophys Res Commun. 318(3), 719-725. Published online 2004/05/18  
335 DOI: 10.1016/j.bbrc.2004.04.083.  
336 Yasuda, K., Moro, M., Akasu, M., and Ohnishi, A. (1989). Pharmacokinetic disposition of cepharanthin  
337 following single and multiple intravenous doses in healthy subjects. Jpn J Clin Pharmacol Ther. 20(4),  
338 741-749.  
339 Zhou, P., Yang, X.L., Wang, X.G., Hu, B., Zhang, L., Zhang, W., Si, H.R., Zhu, Y., Li, B., Huang, C.L., et  
340 al. (2020). A pneumonia outbreak associated with a new coronavirus of probable bat origin. Nature.  
341 579(7798), 270-273. Published online 2020/02/06 DOI: 10.1038/s41586-020-2012-7.  
342 Zhu, N., Zhang, D., Wang, W., Li, X., Yang, B., Song, J., Zhao, X., Huang, B., Shi, W., Lu, R., et al. (2020).  
343 A Novel Coronavirus from Patients with Pneumonia in China, 2019. N Engl J Med. 382(8), 727-733.  
344 Published online 2020/01/25 DOI: 10.1056/NEJMoa2001017.  
345  
346

## 347 **Figure Legends**

348 **Fig. 1. Nelfinavir (NFV) and Cepharranthine (CEP) inhibit SARS-CoV-2 infection.** (A) Schematic of  
349 the SARS-CoV-2 infection assay. VeroE6/TMPRSS2 cells were inoculated with SARS-CoV-2 at an  
350 MOI=0.01 in the presence of compounds. After washing out unbound virus, the cells were incubated  
351 with compounds for 24-48 h. Cells were harvested for immunofluorescence (IFA) or immunoblot  
352 analyses of viral N protein at 24 h and cytopathic effects (CPE) at 48 h post-infection. Solid and dashed  
353 boxes indicate the periods with and without treatment, respectively. (B) Virus-induced CPE following  
354 drug treatment was recorded at 48 h post-infection. Immunofluorescence (C) and immunoblot (D)  
355 detection of viral N protein expression in the infected cells at 24 h post-infection, where the red and blue  
356 signals show N and DAPI, respectively. Dimethyl sulfoxide (DMSO), 0.4%; Lopinavir (LPV), 16  $\mu$ M;  
357 Chloroquine (CLQ), 16  $\mu$ M; Favipiravir (FPV), 32  $\mu$ M; NFV, 4  $\mu$ M; CEP, 8  $\mu$ M. (E, F) Dose-response  
358 curves for compounds. In (E), secreted viral RNA at 24 h post-inoculation was quantified and plotted  
359 against drug concentration and chemical structures shown below each graph (for CEP, the structure of a  
360 major component is shown). In (F), viability of cells treated with the compounds was quantified by MTT  
361 assay. Inferred IC<sub>50</sub>, IC<sub>90</sub>, and CC<sub>50</sub> values are shown. (G) The antiviral activity for each drug is  
362 determined and Instantaneous inhibitory potential (IIP) shown.

363

364 **Fig. 2. Antiviral modes of action for NFV and CEP.** (A, B) Time of addition analysis to examine steps  
365 in SARS-CoV-2 life cycle. (A) shows the schematic of the time of addition analysis. Compounds were  
366 added at different times (a, whole; b, entry; or c, post-entry): (a): presentation during the 1h virus  
367 inoculation step and maintained throughout the 24 h infection period (**whole life cycle**); (b) present during  
368 the 1 h virus inoculation step and for an additional 2 h and then removed (**entry**); or (c): added after the  
369 inoculation step and present for the remaining 22 h of infection (**post-entry**). Solid and dashed boxes  
370 indicate the periods with and without treatment, respectively. In (B), the antiviral activities of each  
371 compound under the various protocols are estimated by quantifying the levels of secreted viral RNA at  
372 24 h post-inoculation. (C) Predicted binding of NFV to SARS-CoV-2 main protease. Representation  
373 of SARS-CoV-2 main protease (green), NFV molecule (cyan stick) and protease binding site residues  
374 around NFV within 4 Å (surface representation) are shown. (D) Virus-cell attachment assay.  
375 VeroE6/TMPRSS2 cells were incubated with virus (MOI=0.001) in the presence of the indicated  
376 compounds for 5 min at 4°C to allow virus-cell attachment with no internalization. After extensive  
377 washing, viral RNA on the cell surface was quantified, where the background depicts residual viral inocula  
378 in the absence of cells. (E) Predicted binding of CEP molecule to SARS-CoV-2 Spike protein. Spike  
379 protein, CEP molecule and protein binding site residues around CEP within 4 Å are shown in cartoon  
380 representation colored in orange, green stick and surface representation, respectively. An Overlapping  
381 view of the ACE2 with CEP is shown in semi-transparent cartoon representation colored in cyan.

382

383 **Fig. 3. Combination treatment with NFV and CEP.** (A) Dose-response curve of NFV/CEP co-  
384 treatment in the infection experiment (MOI=0.001). Extracellular viral RNA levels at 24 h post-infection

385 were quantified and plotted against concentrations of NFV (1.08, 1.30, 1.56, 1.87, and 2.24  $\mu\text{M}$ ) and CEP  
386 (0.78, 1.25, 2.00, 3.20, and 5.12  $\mu\text{M}$ ). **(B)** Cell viability upon co-treatment with compounds. **(C)** The  
387 three-dimensional interaction landscapes of NFV and CEP were evaluated based on the Bliss  
388 independence. Red and blue colors on the contour plot indicate synergy and antagonism, respectively.  
389

390 **Fig. 4. Mathematical prediction of the impact of NFV and CEP therapy on viral dynamics.** **(A)** The  
391 time-dependent antiviral effects of NFV (500 mg, TID, oral) and CEP [100 mg, intravenous drip or 120  
392 mg, oral] predicted by pharmacokinetics/pharmacodynamics (PK/PD) model are shown with enlarged  
393 views of the gray zones in upper panels. **(B)** Viral load dynamics in the presence or absence of NFV  
394 (oral), CEP (intravenous), CEP (oral), and NFV (oral)/CEP (intravenous) combined therapies predicted  
395 by pharmacokinetics/pharmacodynamics/viral-dynamics (PK/PD/VD) models are shown. **(C)** The  
396 cumulative antiviral load [area under the curve in (B)] (upper) and the reduction time (days) for virus  
397 elimination (lower) with drug single or combined treatments are shown.  
398

**Fig. 1**

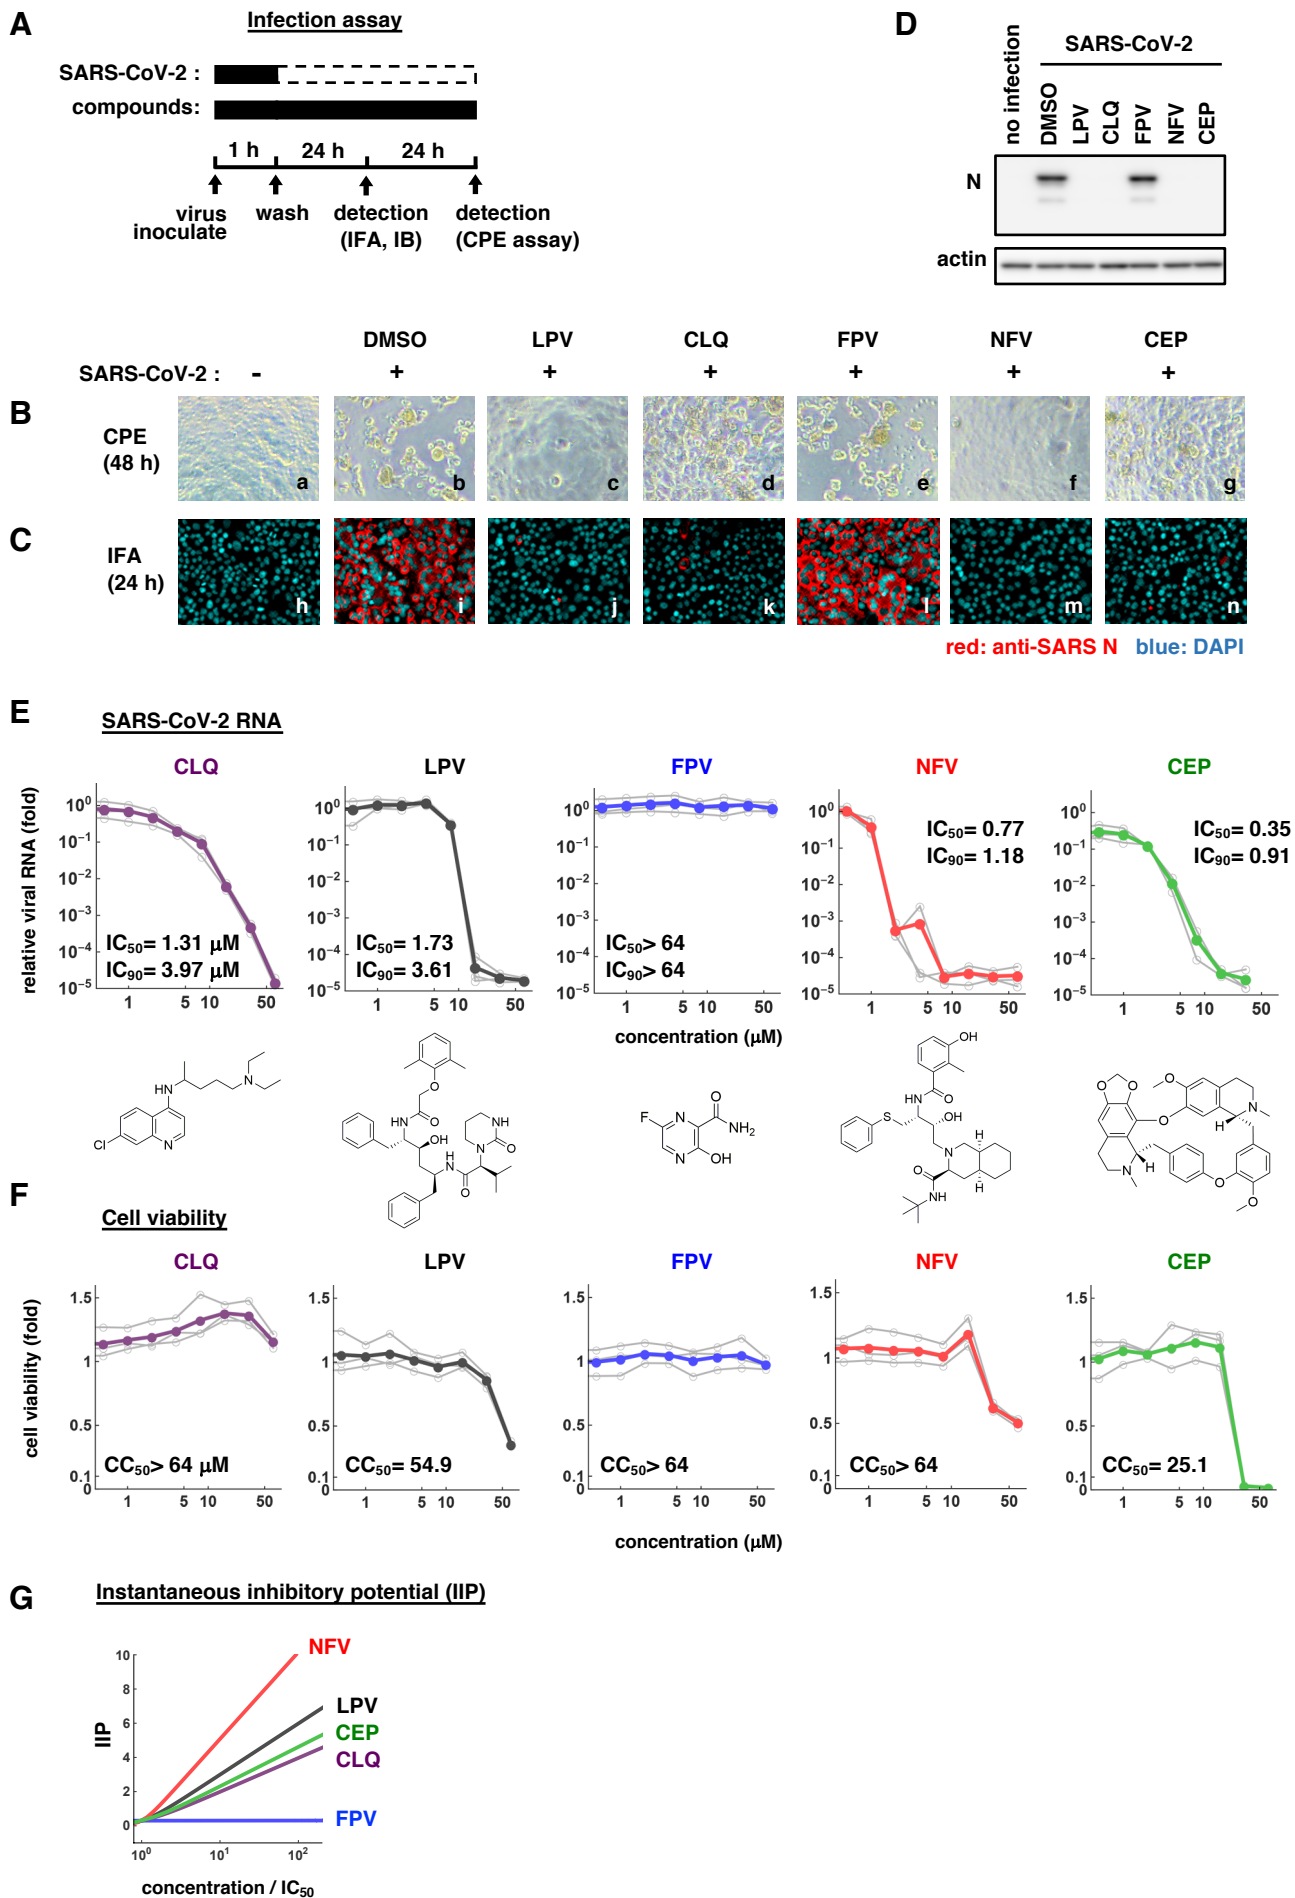

Fig. 2

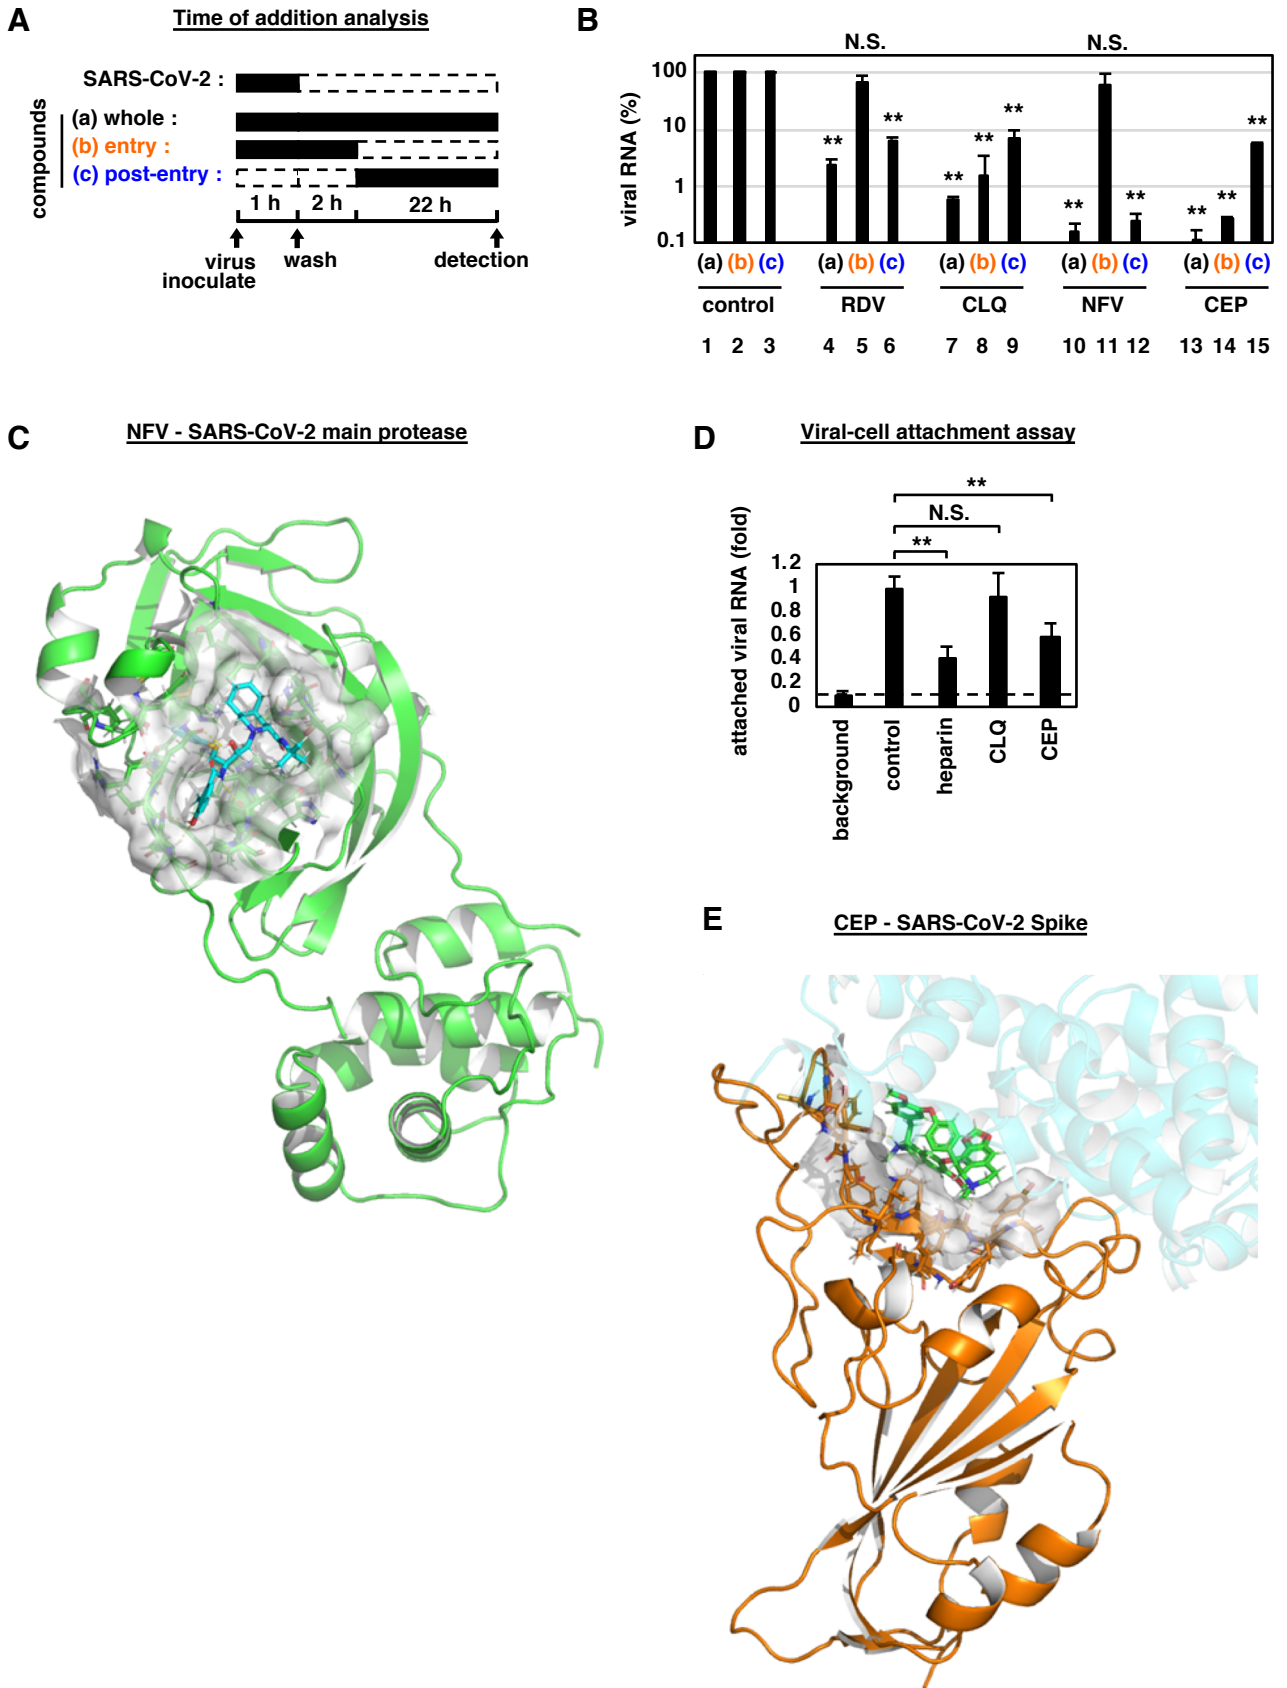



**Fig. 3**

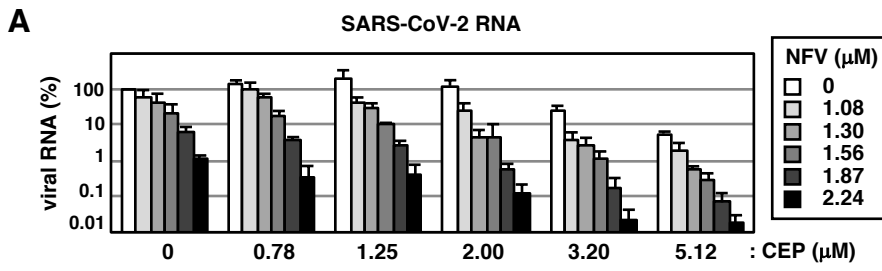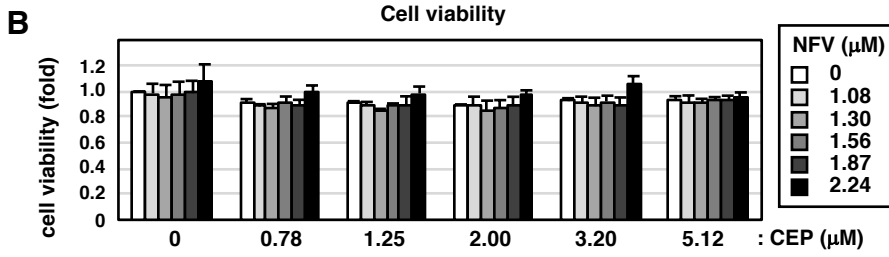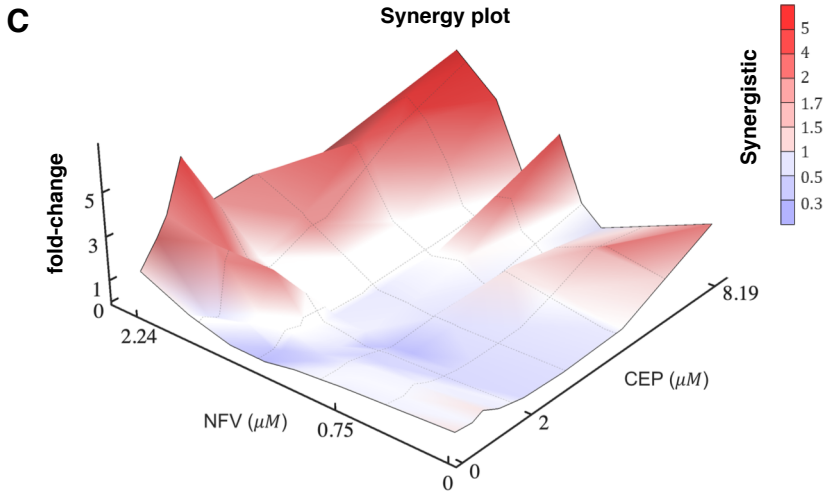

**Fig. 4**

**A**

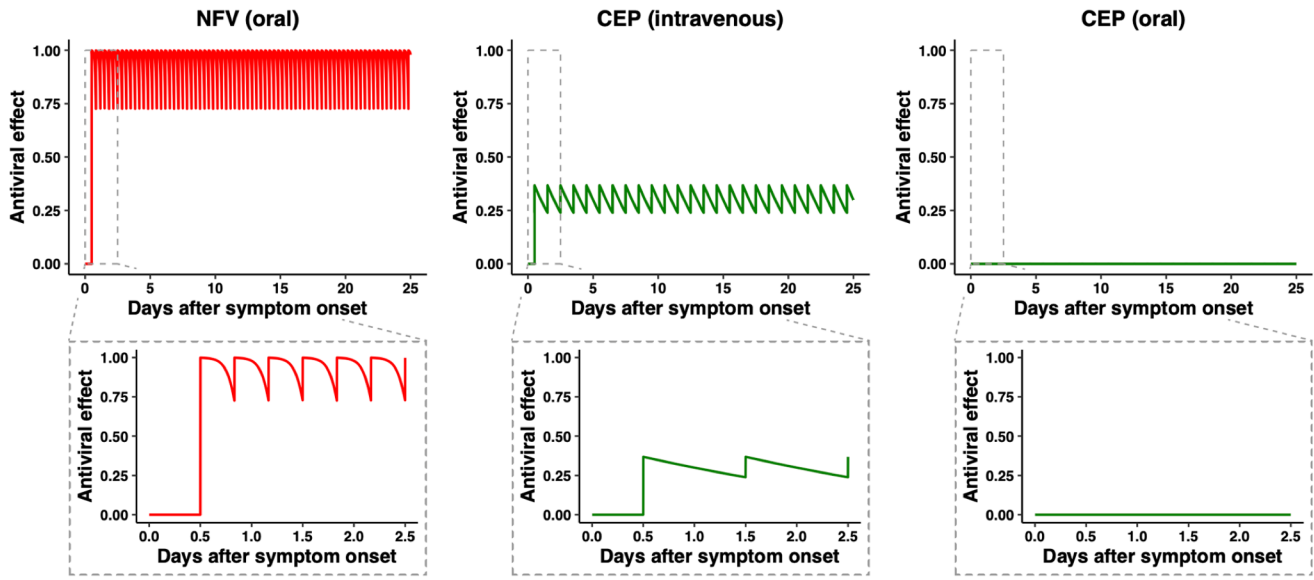

**B**

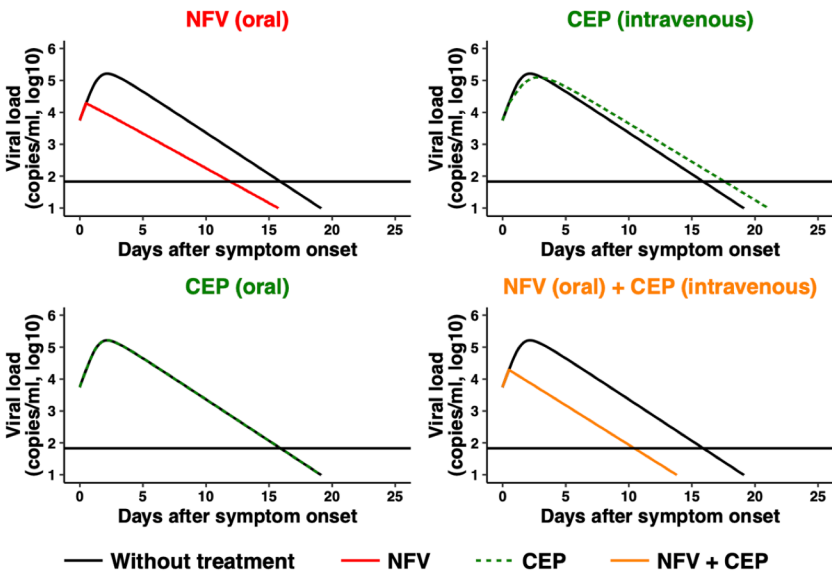

**C**

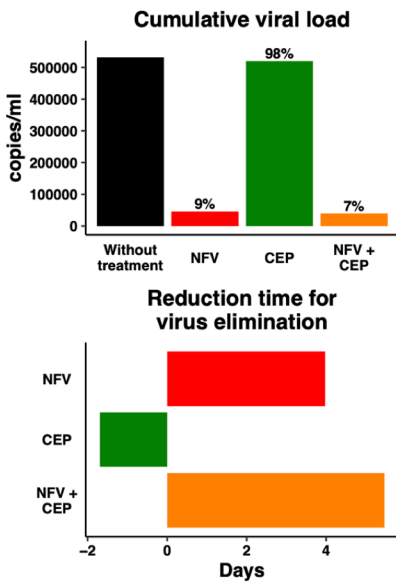

Source: https://www.biorxiv.org/content/biorxiv/early/2020/04/15/2020.04.14.039925.full.pdf
